# Supplementary material
Source: ML conference proceedings conference paper supplement (https://openaccess.thecvf.com/content/ICCV_2019/html/Zhou_Unsupervised_High-Resolution_Depth_ICCV_2019_paper.html)
Supplement: Supplementary file 1 [file Zhou_Unsupervised_High-Resolution_Depth_ICCV_2019_supplemental.pdf]

# Unsupervised High-Resolution Depth Learning From Videos With Dual Networks Supplementary Material

## 1. Network Detail

Our model mainly consists of three parts: LR-Net, HR-Net and PoseNet. The PoseNet is the same as SFM-Learner’s which contains 8 convolutional layers. Relu activation and batch normalization are used except for the last convolutional layer.

The encoder of HR-Net is a simplified ResNet18 (shown in Table 1). The final features of ResNet50 have 2048 channels so we pass them to the first two conv layers (iconv5) in the decoder of LR-Net to reduce the dimensions. Then these features are passed to HR-Net (needed to be resized to align the shape).

LR-Net and HR-Net are typical encoder-decoder architecture with skip-connection. The encoder of LR-Net is a standard ResNet-50 pre-trained on ImageNet. The decoders of LR-Net and HR-Net are almost the same and their details are shown in Table 2.

| layer              | in-chns | out-chns | res | input       |
|--------------------|---------|----------|-----|-------------|
| econv1             | 3       | 64       | 2   | image       |
| epool              | 64      | 64       | 4   | econv1      |
| resblock1_1        | 64      | 64       | 4   | epool       |
| resblock1_2(elay1) | 64      | 128      | 8   | resblock1_1 |
| resblock2_1        | 128     | 128      | 8   | resblock1_2 |
| resblock2_2(elay2) | 128     | 256      | 16  | resblock2_1 |
| resblock3_1        | 256     | 256      | 8   | resblock2_2 |
| resblock3_2(elay3) | 256     | 512      | 32  | resblock3_1 |

Table 1. HR-Net encoder structure. resblock is the Bottleneck module for building resnet.

| layer   | in-chns | out-chns | res | input                        | activation |
|---------|---------|----------|-----|------------------------------|------------|
| upconv6 | 2048    | 512      | 64  | elayer4                      | BN+Relu    |
| iconv6  | 1536    | 512      | 32  | ↑upconv6<br>elayer3          | BN+Relu    |
| upconv5 | 512     | 256      | 32  | iconv6                       | BN+Relu    |
| iconv5  | 768     | 256      | 16  | ↑upconv5<br>elayer2          | BN+Relu    |
| upconv4 | 256     | 128      | 16  | iconv5                       | BN+Relu    |
| iconv4  | 384     | 128      | 8   | ↑upconv4<br>elayer1          | BN+Relu    |
| disp4   | 128     | 1        | 8   | iconv4                       | Sigmoid    |
| upconv3 | 128     | 64       | 8   | iconv4                       | BN+Relu    |
| iconv3  | 129     | 64       | 4   | ↑upconv3<br>epool<br>↑disp4  | BN+Relu    |
| disp3   | 64      | 1        | 4   | iconv3                       | Sigmoid    |
| upconv2 | 64      | 32       | 4   | iconv3                       | BN+Relu    |
| iconv2  | 97      | 32       | 2   | ↑upconv2<br>econv1<br>↑disp3 | BN+Relu    |
| disp2   | 32      | 1        | 2   | iconv2                       | Sigmoid    |
| upconv1 | 32      | 16       | 2   | iconv2                       | BN+Relu    |
| iconv1  | 17      | 16       | 1   | ↑upconv1<br>↑disp2           | BN+Relu    |
| disp1   | 16      | 1        | 1   | iconv1                       | Sigmoid    |

Table 2. Decoder structure, in-chns is # of input channels, out-chns is # of output channels, res is the downscaling factor relative to the input image. ↑ denotes 2× nearest-neighbor upsampling. All the kernel sizes are 3 and strides are 1. “elayer\*” denotes the features from encoder. Both decoders of LR-Net and HR-Net are almost the same except upconv6 due to the concatenation.
